# Supplementary material
Source: Royal Society of Chemistry journal article supplement (doi:10.1039/d6sd00003g)
Supplement: d6sd00003g1.pdf [file d6sd00003g1.pdf]

## **Quantification of Avian Influenza A Virus (H5N1) via Enzymatic Reactions and Glucometer Test Strips**

### **Supplementary Information**

Md Reazul Islam <sup>1</sup>, Faisal Hossain<sup>1</sup>, Michael A. Joyce <sup>2,3</sup>, Mohamed Elaish <sup>4,5</sup>, D. Lorne Tyrrell  
<sup>2,3</sup>, Tom C. Hobman <sup>2,3,4</sup>, Michael J. Serpe <sup>1</sup>

1. Department of Chemistry, University of Alberta, Edmonton, AB, Canada, T6G 2N4.

2. Dept. of Medical Microbiology and Immunology, University of Alberta, Edmonton, AB, Canada T6G 2S2.

3. Li Ka Shing Centre for Health Research Innovation, 7-126, Edmonton, AB T6G 2E1.

4. Department of Cell Biology, University of Alberta, Edmonton, AB T6G 2H7, Canada.

5. Poultry Disease Department, Faculty of Veterinary Medicine, Cairo University, Giza, Egypt.

**Table S1.** Performance comparison of the present H5N1 detection method with representative recent platforms (as reported in the cited sources).

| Method / Platform                                        | Target                   | Detection Format              | Matrix                                         | LOD (reported)                                                                         | Reference                         |
|----------------------------------------------------------|--------------------------|-------------------------------|------------------------------------------------|----------------------------------------------------------------------------------------|-----------------------------------|
| This work (binding buffer, artificial saliva, tap water) | H5N1 virus (via HA)      | Amperometric (glucose strip)  | Binding buffer / Artificial saliva / Tap water | $7.78 \times 10^5 - 1.46 \times 10^6$ RNA copies mL <sup>-1</sup>                      | This work                         |
| Paper-based electrochemical immunosensor                 | H5N1 HA antigen          | DPV electrochemical           | PBS                                            | 55.7 pg mL <sup>-1</sup> (0.95 pM)                                                     | Lee et al., 2022 <sup>1</sup>     |
| Capacitive biosensor                                     | H5N1 viral RNA           | Capacitive response           | Aerosol samples                                | 56 RNA copies mL <sup>-1</sup>                                                         | Kumar et al., 2025 <sup>2</sup>   |
| RT-RAA + CRISPR-Cas13a + LFD                             | H5 subtype AIV (HA gene) | Lateral flow                  | Clinical poultry samples                       | 0.1 copy $\mu$ L <sup>-1</sup>                                                         | Li et al., 2023 <sup>3</sup>      |
| RT-RAA + CRISPR-Cas13a                                   | Pan-AIV (M gene)         | Fluorescence / LFA            | —                                              | 1 copy $\mu$ L <sup>-1</sup> (fluorescence); 10 copies $\mu$ L <sup>-1</sup> (LFA)     | Yang et al., 2025 <sup>4</sup>    |
| SPR biosensor                                            | H5N1 virus               | SPR ( $\Delta$ RU)            | Poultry samples                                | 2.24 Hemagglutination unit                                                             | Prayugo et al., 2025 <sup>5</sup> |
| Commercial rapid antigen & POC molecular tests           | H5N1 strains             | LFA / Molecular amplification | Nasal swab                                     | 1.55–7.75 TCID <sub>50</sub> /swab (molecular); 78–1550 TCID <sub>50</sub> /swab (LFA) | Bassit et al., 2025 <sup>6</sup>  |

Units are reproduced as reported in the original publications. Due to differences in reporting formats (RNA copies, TCID<sub>50</sub>, PFU, antigen mass, HAU), direct numerical comparison should be interpreted cautiously.

**Table S2.** Comparison of conventional ALP–PNPP colorimetric detection (UV–Vis, A405) and electrochemical strip-based amperometric detection for H5N1 quantification. The PNPP reaction mixture (200  $\mu\text{L}$ , 37  $^{\circ}\text{C}$ , 15 min) was divided into two equal aliquots for absorbance measurement and electrochemical analysis. Absorbance values represent the mean  $\pm$  standard deviation of three replicate measurements ( $n = 3$ ). Electrochemical currents were obtained using three independent glucose test strips, and values represent mean  $\pm$  standard deviation. Relative precision was evaluated using the coefficient of variation (CV%).

Electrochemical signal was quantified as the mean current (nA) averaged over 3–20 s of each chronoamperometric trace and summarized across three independent strips.

| H5N1 (RNA copies $\text{mL}^{-1}$ ) | A405 Mean $\pm$ SD | A405 CV (%) | Electrochemical Mean $\pm$ SD (nA) | Electrochemical CV (%) |
|-------------------------------------|--------------------|-------------|------------------------------------|------------------------|
| Blank                               | 0.023 $\pm$ 0.003  | 11.5        | 74 $\pm$ 3                         | 4.2                    |
| $5.90 \times 10^6$                  | 0.032 $\pm$ 0.003  | 9.4         | 84 $\pm$ 4                         | 4.3                    |
| $2.21 \times 10^7$                  | 0.085 $\pm$ 0.004  | 4.1         | 111 $\pm$ 7                        | 6.1                    |

**Table S3.** Spike–recovery, accuracy, and precision analysis of H5N1 detection across tested matrices.

Expected concentrations were prepared independently in each matrix. Measured values were back calculated from calibration curves. Intra-assay CV% represents variability across strips (n=3). Inter-assay CV% represents variability across independent runs performed on two different days.

| Matrix               | Expected<br>(RNA<br>copies mL <sup>-1</sup> ) | Measured<br>(RNA<br>copies mL <sup>-1</sup> ) | Recovery<br>(%) | Intra-assay<br>CV (%) | Inter-assay<br>CV (%) |
|----------------------|-----------------------------------------------|-----------------------------------------------|-----------------|-----------------------|-----------------------|
| Binding<br>buffer    | 2.94 × 10 <sup>6</sup>                        | 2.43 × 10 <sup>6</sup>                        | 82.59           | —                     | 11.13                 |
| Tap water            | 2.94 × 10 <sup>6</sup>                        | 9.83 × 10 <sup>5</sup>                        | 33.44           | 25.73                 | —                     |
| Artificial<br>saliva | 2.94 × 10 <sup>6</sup>                        | 1.86 × 10 <sup>6</sup>                        | 63.41           | 10.60                 | —                     |
| Binding<br>buffer    | 5.90 × 10 <sup>6</sup>                        | 5.21 × 10 <sup>6</sup>                        | 88.23           | —                     | 6.49                  |
| Tap water            | 5.90 × 10 <sup>6</sup>                        | 4.89 × 10 <sup>6</sup>                        | 82.80           | 19.13                 | —                     |
| Artificial<br>saliva | 5.90 × 10 <sup>6</sup>                        | 5.55 × 10 <sup>6</sup>                        | 94.15           | 15.09                 | —                     |
| Binding<br>buffer    | 1.47 × 10 <sup>7</sup>                        | 1.64 × 10 <sup>7</sup>                        | 111.80          | —                     | 5.03                  |
| Tap water            | 1.47 × 10 <sup>7</sup>                        | 1.76 × 10 <sup>7</sup>                        | 119.66          | 10.67                 | —                     |
| Artificial<br>saliva | 1.47 × 10 <sup>7</sup>                        | 1.65 × 10 <sup>7</sup>                        | 112.38          | 7.44                  | —                     |
| Binding<br>buffer    | 2.21 × 10 <sup>7</sup>                        | 2.15 × 10 <sup>7</sup>                        | 97.44           | —                     | 1.91                  |
| Tap water            | 2.21 × 10 <sup>7</sup>                        | 2.22 × 10 <sup>7</sup>                        | 100.79          | 12.16                 | —                     |
| Artificial<br>saliva | 2.21 × 10 <sup>7</sup>                        | 2.16 × 10 <sup>7</sup>                        | 98.09           | 5.46                  | —                     |
| Binding<br>buffer    | 5.88 × 10 <sup>7</sup>                        | 5.76 × 10 <sup>7</sup>                        | 98.01           | —                     | 1.73                  |
| Tap water            | 5.88 × 10 <sup>7</sup>                        | 5.38 × 10 <sup>7</sup>                        | 91.54           | 13.60                 | —                     |
| Artificial<br>saliva | 5.88 × 10 <sup>7</sup>                        | 5.69 × 10 <sup>7</sup>                        | 96.82           | 1.96                  | —                     |

Table S4. Composition of the ZeptoMetrix respiratory pathogen pools used for selectivity testing.

| Pool   | Number | Pathogen name                                |
|--------|--------|----------------------------------------------|
| Pool 1 | 1      | Influenza A H1N1 (A/NY/02/09)                |
|        | 2      | Parainfluenza Type 4A                        |
|        | 3      | Parainfluenza Type 4B                        |
|        | 4      | Rhinovirus (1A)                              |
|        | 5      | Adenovirus Type 3                            |
| Pool 2 | 1      | Influenza A H1 (A/New Caledonia/20/99)       |
|        | 2      | Respiratory Syncytial Virus A                |
|        | 3      | Parainfluenza Type 1                         |
|        | 4      | Coronavirus NL63                             |
|        | 5      | <i>Mycoplasma pneumoniae</i> (M129)          |
| Pool 3 | 1      | Influenza A H3 (A/Brisbane/10/07)            |
|        | 2      | Respiratory Syncytial Virus B (CH93(18)-18)  |
|        | 3      | Coronavirus OC43                             |
|        | 4      | Coronavirus HKU-1 (Recombinant)              |
| Pool 4 | 1      | Influenza B (B/Florida/02/06)                |
|        | 2      | Parainfluenza Type 3                         |
|        | 3      | Human Metapneumovirus (Peru6-2003)           |
|        | 4      | <i>Legionella pneumophila</i> (Philadelphia) |
| Pool 5 | 1      | Parainfluenza Type 2                         |
|        | 2      | Coronavirus 229E                             |
|        | 3      | Human Bocavirus                              |
|        | 4      | <i>Chlamydomydia pneumoniae</i> (CWL-029)    |

Reference:

1. D. Lee, J. Bhardwaj and J. Jang, *Sci. Rep.*, 2022, 12, 2311.
2. J. Kumar, M. Xu, Y. A. Li, S. W. You, B. M. Doherty, W. D. Gardiner, J. R. Cirrito, C. M. Yuede, A. Benegal, M. D. Vahey, A. Joshi, K. Seehra, A. C. M. Boon, Y. Y. Huang, J. V. Puthussery and R. K. Chakrabarty, *ACS Sens.*, 2025, 10, 3381–3389.
3. Y. Li, J. Shang, J. Luo, F. Zhang, G. Meng, Y. Feng, W. Jiang, X. Yu, C. Deng, G. Liu and H. Liu, *Front. Microbiol.*, 2023, 14, 1283210.
4. Y. Yang, Z. Yang, X. Zhang, B. Niu, Q. Huang, Y. Li, H. Yin, X. Zhang, M. Liao and W. Jia, *Poult. Sci.*, 2025, 104, 104745.
5. A. D. Prayugo, W. Widayat, T. Subroto, W. Arnafia, M. Yusuf, G. Gumilar, Y. F. Achmad, B. Sundari, A. K. Nissa and D. Sibit, *Talanta Open*, 2025, 12, 100577.
6. L. Bassit, G. L. Damhorst, H. B. Bowers, C. Sabino, J. Sullivan, E. B. Kennedy, J. Khouri, P. Miller, E. Lai, R. F. Schinazi, W. A. Lam, N. R. Pollock and A. Rao, *J. Clin. Microbiol.*, 2025, 63, e0054825.
